# Supplementary material
Source: PubMed Central journal article supplement (PMC8260499)
Supplement: mmc1.pdf [file mmc1.pdf]

## Supplemental information

### Generation of glucocorticoid-resistant

### SARS-CoV-2 T cells for adoptive cell therapy

Rafet Basar, Nadima Uprety, Emily Ensley, May Daher, Kimberly Klein, Fernando Martinez, Fleur Aung, Mayra Shanley, Bingqian Hu, Elif Gokdemir, Ana Karen Nunez Cortes, Mayela Mendt, Francia Reyes Silva, Sunil Acharya, Tamara Laskowski, Luis Muniz-Feliciano, Pinaki P. Banerjee, Ye Li, Sufang Li, Luciana Melo Garcia, Paul Lin, Hila Shaim, Sean G. Yates, David Marin, Indreshpal Kaur, Sheetal Rao, Duncan Mak, Angelique Lin, Qi Miao, Jinzhuang Dou, Ken Chen, Richard E. Champlin, Elizabeth J. Shpall, and Katayoun Rezvani

## Supplemental Information

### Supplemental Figures

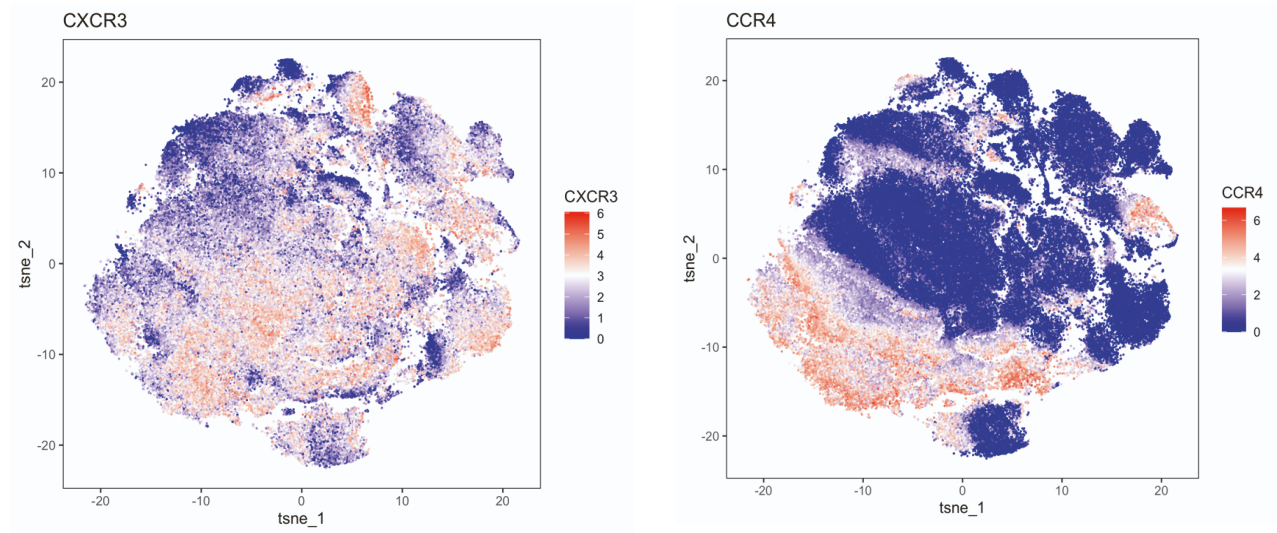

**Figure S1. SARS-CoV-2 CTL's express chemokine receptors that support trafficking to the lungs, related to Figure 1.** T-SNE plots showing expression of chemokine receptors that support trafficking to the lungs in SARS-CoV-2 CTL's, left panel showing CXCR3 and right panel showing CCR4.

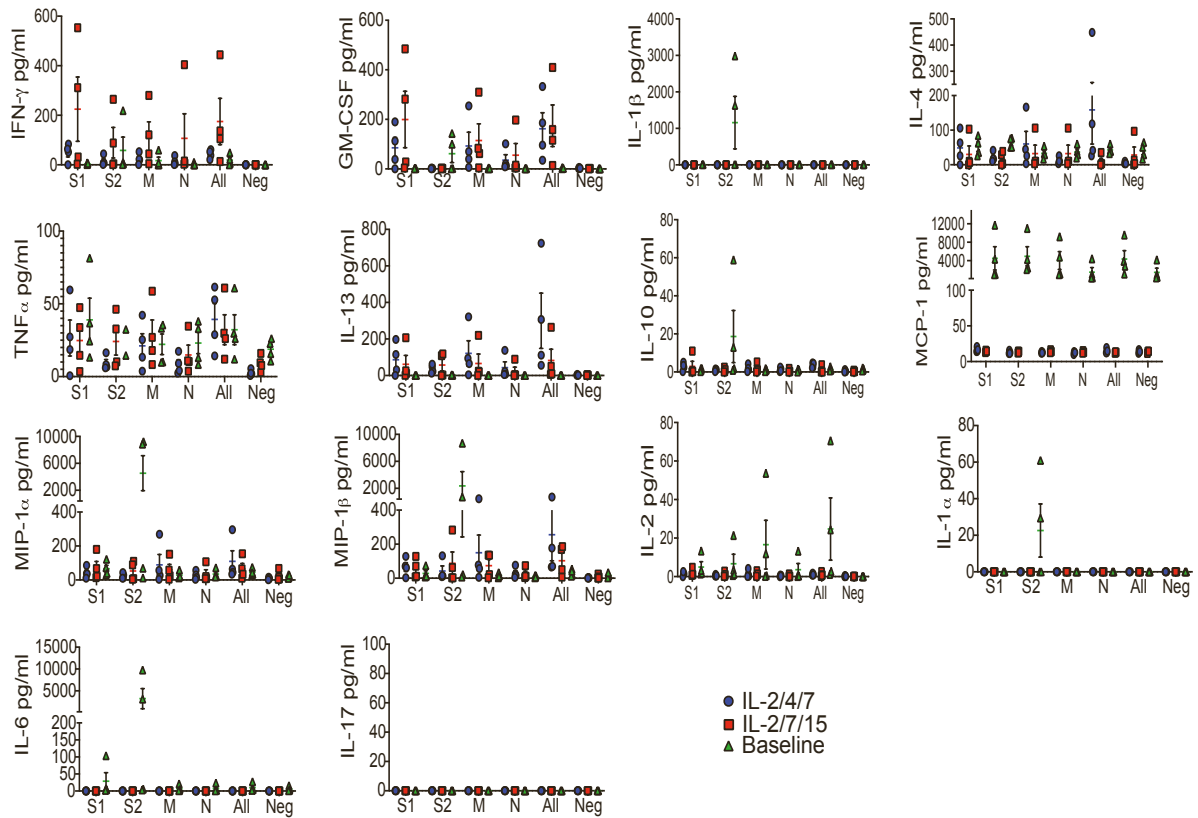

**Figure S2. Cytokine profile from COVID-19 reactive T cells supports a functional profile without CRS, related to Figure 1.** Multiplex cytokine analysis showing the concentration of different cytokines in pg/ml detected in supernatants from COVID-19 reactive T cells stimulated with the different peptide libraries (S1, S2, M and N, either separately or in combination) at baseline (green triangles) or after expansion with IL-2/4/7 (blue circles) or IL-2/7/15 (red squares). n=4 samples per group. Neg refers to negative control without peptide stimulation.

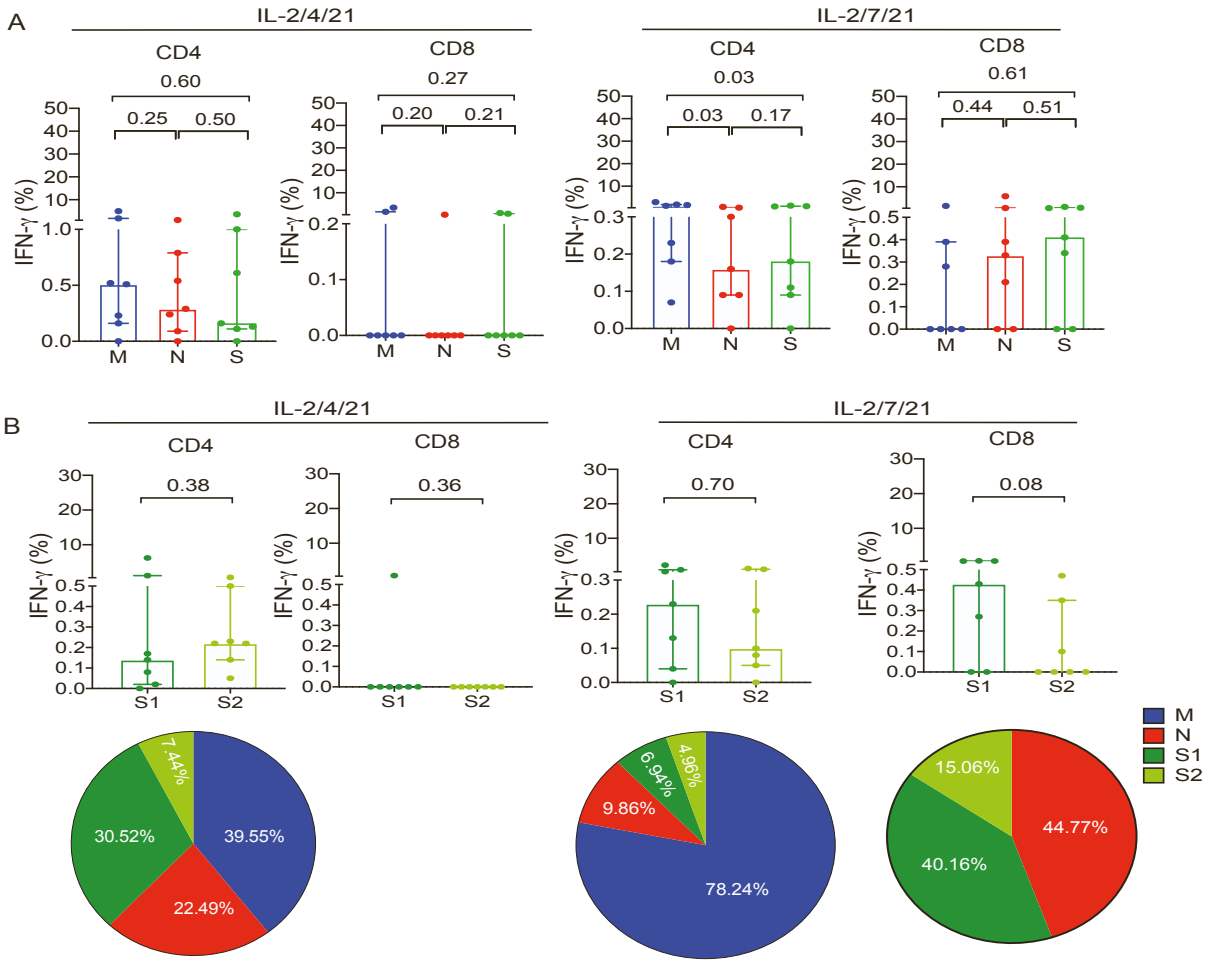

**Figure S3. Expanded COVID-19 CTLs are directed against structural proteins, including both the C and N terminals of the S protein, related to Figure 3.** **A**, Percentage of IFN- $\gamma$  (+) COVID-19 reactive CD3<sup>+</sup> T cells stimulated with the peptide libraries derived from the different structural proteins M (blue), N (red), S (green) cultured with different cytokine cocktails IL2/4/21 (left panel) or IL2/7/21 (right panel). **B**, Quantification of IFN- $\gamma$  (+) COVID-19 reactive T cells subsets (CD4<sup>+</sup> or CD8<sup>+</sup>) directed against N-terminus (S1, dark green) or the C-terminus (S2, light green) of the S protein in both IL-2/4/21 (left panels) and IL-2/7/21 (right panels) stimulation conditions (n=7 samples per group). Bars represent median values with interquartile range. p-values are indicated at the top of each graph. Corresponding pie charts showing the percent distribution of M (blue), N (red), S1 (dark green) and S2 (light green) reactive IFN- $\gamma$  (+) T cells are depicted under each bar graph. Please note that a pie chart was not generated for the CD8<sup>+</sup> T cells cultured with IL-2/4/21 due to the very low number of cells. Inset percentages (%) within each pie chart represent the fraction of IFN- $\gamma$  (+) T cells that are reactive to specific peptides. Sum of all fractions is 100% representing the total IFN- $\gamma$  (+) T cells. Statistical analysis by paired t-test (A, B).

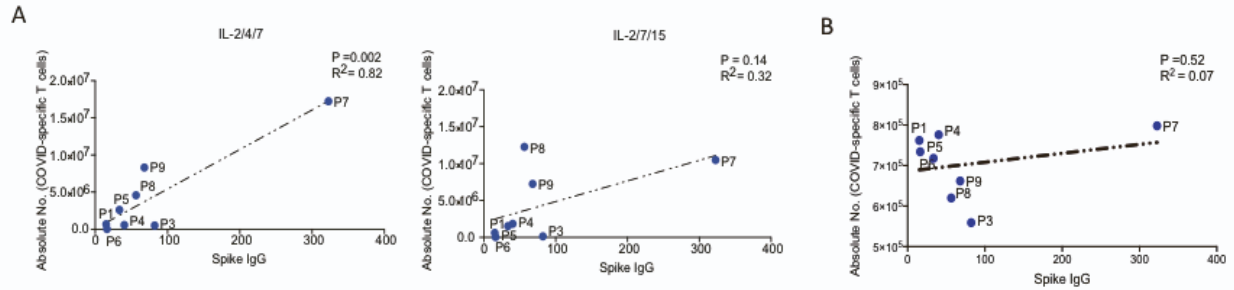

**Figure S4. Absolute number of COVID-19 specific T cells cultured with IL-2/4/7 correlates with antibody titer of Spike protein IgG, related to Figure 3. A.** Scatter plots showing correlation between absolute number of COVID-19 specific T cells (on Y axis) and antibody titers on the X axis (Spike IgG) of COVID-19 specific T cells expanded with IL-2/4/7 (left panel) or IL-2/7/15 (right panel). **B.** Scatter plot showing no correlation between absolute number of COVID-19 specific T cells (on Y axis) and antibody titers on the X axis (Spike IgG) of COVID-19 specific T cells prior to expansion. Statistical analysis by simple linear regression analysis (A, B).

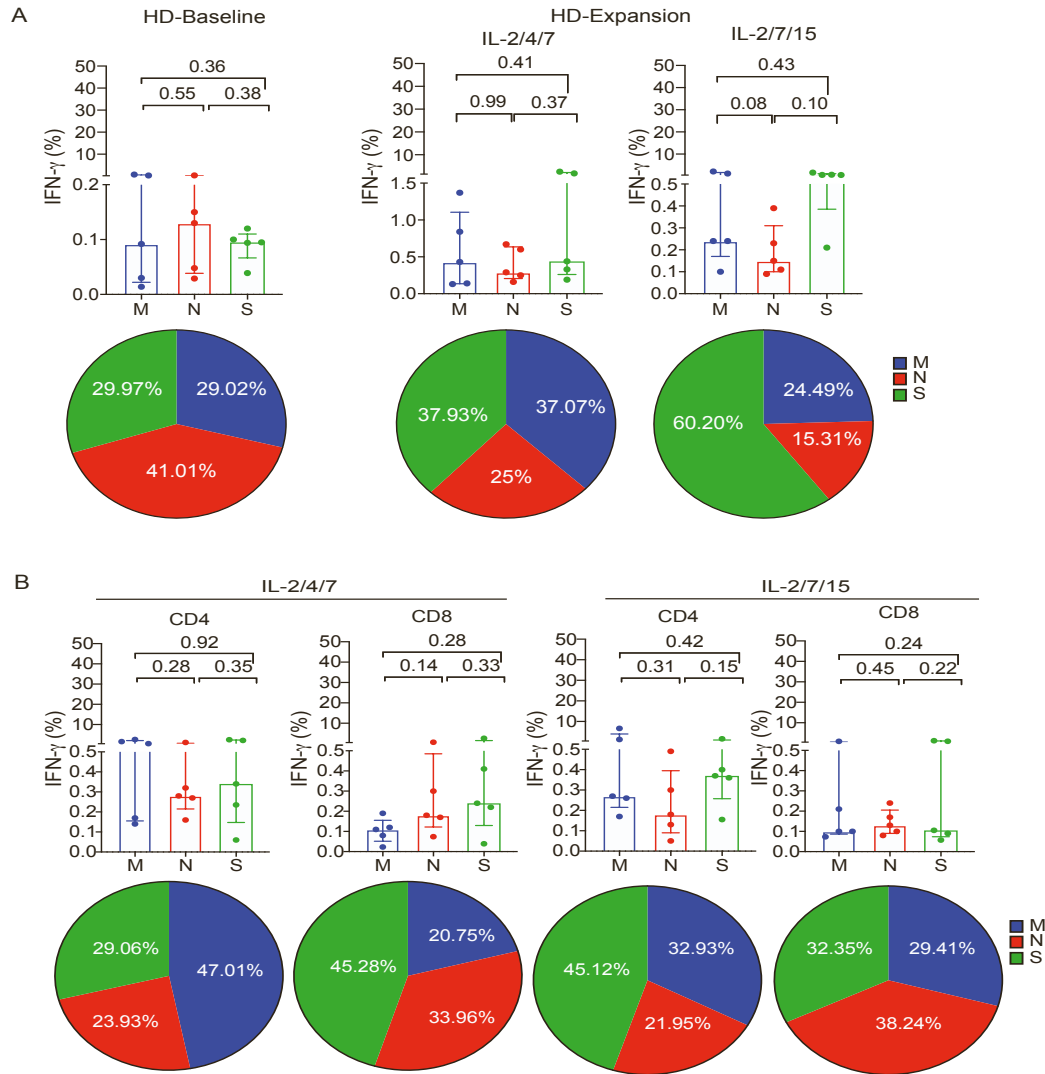

**Figure S5. COVID-19 CTLs can be expanded from the PB of healthy donors but at lower frequencies compared to COVID-19-recovered donors, related to Figure 4.** **A, B** Graphical analysis of IFN- $\gamma$  (+) COVID-19 reactive CD3+ T cells from healthy donors stimulated with the peptide libraries derived from the different structural proteins M (blue), N (red), S (green) at **(A)** baseline or **(B)** cultured with IL-2/4/7 (left panel) or IL-2/7/15 (right panel). Corresponding pie charts show the distribution of M (blue), N (red) or S (green) reactive IFN- $\gamma$  (+) T cells for each group (n=5 samples per group). Bars represent median values with interquartile range. p-values are indicated at the top of each graph. **C**, Percentage of IFN- $\gamma$  (+) COVID-19 reactive CD4 and CD8 T cells generated from PB of healthy donors stimulated with the peptide libraries derived from the different structural proteins M (blue), N (red), S (green) after expansion with IL-2/4/7 (left panels) or IL-2/7/15 (right panels). Distribution of M (blue), N (red) or S (green) reactive IFN- $\gamma$  (+) T cells for each group is shown in pie charts below corresponding graphs (n=5 samples per group). Bars represent median values with interquartile range. p-values are indicated at the top of each graph. Inset percentages (%) within each pie chart represent the fraction of IFN- $\gamma$  (+) T cells that are reactive to specific peptides. Sum of all fractions is 100% representing the total IFN- $\gamma$  (+) T cells. Statistical analysis by paired t-test (A, B).

Supplemental Tables

Table S1. Mass cytometry panel used for phenotyping of COVID-19 reactive T cells, related to Figure 1.

| Tag   | Antibody   | Clone     | Source          |
|-------|------------|-----------|-----------------|
| 89Y   | CD45       | HI30      | Fluidigm        |
| 141Pr | CCR6       | G034E3    | Fluidigm        |
| 142Nd | IL4        | MP425D2   | Fluidigm        |
| 143Nd | CD4        | OKT4      | Biolegend       |
| 144Nd | IL2        | MQ1-17H12 | BD Biosciences  |
| 145Nd | CD62L      | DREG-56   | Biolegend       |
| 146Nd | CD8        | RPA-T8    | Biolegend       |
| 147Sm | CD127      | MB15-18C9 | Miltenyi Biotec |
| 148Nd | IL17a      | BL168     | Biolegend       |
| 149Sm | CD25       | 2A3       | BD Biosciences  |
| 150Nd | CD28       | CD28.2    | BD Biosciences  |
| 151Eu | CD107a     | H4A3      | BD Biosciences  |
| 152Sm | CD95       | DX2       | BD Biosciences  |
| 153Eu | CCR4       | 205410    | R&D Systems     |
| 154Sm | TIGIT      | MSA43     | Thermo Fisher   |
| 155Gd | CD27       | M-T271    | BD Biosciences  |
| 156Gd | CXCR4      | 12G5      | Biolegend       |
| 158Gd | OX40       | ACT35     | Biolegend       |
| 159Tb | Perforin   | delta G9  | Miltenyi Biotec |
| 160Gd | CD45RA     | HI100     | Biolegend       |
| 161Dy | TIM3       | REA635    | Miltenyi Biotec |
| 162Dy | Ki-67      | Ki-67     | Biolegend       |
| 163Dy | CXCR3      | G025H7    | Biolegend       |
| 164Dy | CD45RO     | UCHL1     | Biolegend       |
| 165Ho | CTLA-4     | L3D10     | Biolegend       |
| 166Er | MIP1b      | W15138A   | Biolegend       |
| 167Er | CCR7       | G043H7    | Biolegend       |
| 168Er | IFNg       | B27       | Biolegend       |
| 169Tm | TNFa       | MAb11     | Biolegend       |
| 170Er | HLA-DR     | L243      | Biolegend       |
| 171Yb | CD161      | 191B8     | Miltenyi        |
| 172Yb | KLRG1      | 13F12F2   | Thermo Fisher   |
| 173Yb | Granzyme B | GB11      | Fluidigm        |
| 174Yb | PD1        | PD1.3.1.3 | Miltenyi Biotec |
| 175Lu | LAG3       | 11C3C65   | Biolegend       |
| 176Yb | CD38       | REA572    | Miltenyi Biotec |
| 209Bi | 41BB       | 4B4-1     | Biolegend       |
| 115In | CD57       | HCD57     | Biolegend       |
| Pt194 | CD3        | UCTH1     | Biolegend       |
| Pt198 | LD         |           |                 |

**Table S2. Cytokine production and fold expansion of COVID-19 reactive T cells derived from the different recovered donors and expanded with IL-2/4/7 or IL-2/7/15 cytokine cocktails, related to Figure 1.**

|           |                |               | IL-2/4/7  |       |       |       |       |       |       |       |      |
|-----------|----------------|---------------|-----------|-------|-------|-------|-------|-------|-------|-------|------|
|           |                |               | CD3 %     |       |       | CD4 % |       |       | CD8 % |       |      |
|           | Fold Expansion |               | M         | N     | S     | M     | N     | S     | M     | N     | S    |
| Patient 1 | 177.37         | IFN- $\gamma$ | 5.59      | 6.44  | 14.80 | 7.90  | 8.29  | 20.10 | 0.43  | 2.62  | 1.40 |
|           |                | IL-2          | 0.92      | 0.91  | 2.31  | 0.45  | 0.47  | 1.82  | 0.81  | 0.71  | 0.79 |
|           |                | TNF- $\alpha$ | 3.18      | 2.67  | 6.52  | 3.14  | 3.10  | 7.12  | 1.45  | 1.13  | 2.03 |
| Patient 3 | 506.42         | IFN- $\gamma$ | 1.22      | 17.10 | 13.50 | 0.91  | 18.90 | 15.00 | 3.77  | 0.81  | 1.25 |
|           |                | IL-2          | 0.14      | 1.85  | 1.07  | 0.14  | 2.09  | 1.21  | 0.09  | 0.34  | 0.34 |
|           |                | TNF- $\alpha$ | 0.67      | 7.50  | 3.99  | 0.57  | 8.41  | 4.59  | 0.66  | 0.00  | 0.11 |
| Patient 4 | 540.69         | IFN- $\gamma$ | 2.74      | 10.20 | 3.84  | 2.51  | 9.01  | 3.24  | 0.21  | 5.08  | 0.32 |
|           |                | IL-2          | 0.43      | 1.40  | 0.94  | 0.36  | 1.09  | 0.80  | 0.17  | 0.41  | 0.32 |
|           |                | TNF- $\alpha$ | 1.66      | 5.35  | 3.23  | 1.63  | 5.06  | 3.26  | 1.05  | 3.01  | 2.42 |
| Patient 5 | 897.59         | IFN- $\gamma$ | 2.94      | 2.87  | 10.90 | 2.70  | 2.41  | 10.50 | 1.06  | 19.40 | 0.61 |
|           |                | IL-2          | 0.21      | 0.32  | 0.54  | 0.23  | 0.31  | 0.53  | 0.00  | 0.24  | 0.20 |
|           |                | TNF- $\alpha$ | 1.23      | 1.18  | 4.42  | 1.30  | 1.26  | 4.64  | 0.53  | 3.07  | 0.61 |
| Patient 6 | 7.16           | IFN- $\gamma$ | 0.11      | 0.12  | 0.21  | 0.14  | 0.14  | 0.22  | 0.10  | 0.05  | 0.25 |
|           |                | IL-2          | 0.21      | 0.23  | 0.20  | 0.16  | 0.18  | 0.16  | 0.23  | 0.16  | 0.22 |
|           |                | TNF- $\alpha$ | 0.19      | 0.22  | 0.25  | 0.05  | 0.04  | 0.07  | 0.10  | 0.12  | 0.32 |
| Patient 7 | 45572.50       | IFN- $\gamma$ | 33.60     | 9.81  | 10.30 | 33.40 | 9.31  | 10.80 | 42.00 | 19.40 | 3.99 |
|           |                | IL-2          | 1.41      | 1.10  | 0.97  | 1.44  | 1.11  | 0.99  | 0.61  | 0.43  | 0.22 |
|           |                | TNF- $\alpha$ | 12.90     | 5.36  | 5.43  | 12.90 | 5.20  | 5.53  | 4.36  | 3.70  | 0.45 |
| Patient 8 | 2645.58        | IFN- $\gamma$ | 6.81      | 3.33  | 4.87  | 5.77  | 3.46  | 5.48  | 25.90 | 4.53  | 0.27 |
|           |                | IL-2          | 0.92      | 0.52  | 0.67  | 0.58  | 0.35  | 0.40  | 1.20  | 0.57  | 0.68 |
|           |                | TNF- $\alpha$ | 2.80      | 0.87  | 1.71  | 2.64  | 0.88  | 1.81  | 5.65  | 0.97  | 0.68 |
| Patient 9 | 3537.23        | IFN- $\gamma$ | 18.90     | 3.51  | 12.50 | 17.50 | 2.77  | 12.70 | 19.00 | 14.00 | 1.02 |
|           |                | IL-2          | 3.80      | 1.16  | 1.34  | 3.51  | 0.93  | 1.32  | 1.13  | 1.12  | 0.18 |
|           |                | TNF- $\alpha$ | 12.50     | 2.35  | 7.86  | 12.20 | 2.09  | 7.90  | 1.83  | 0.56  | 0.09 |
|           |                |               | IL-2/7/15 |       |       |       |       |       |       |       |      |
|           |                |               | CD3 %     |       |       | CD4 % |       |       | CD8 % |       |      |
|           | Fold Expansion |               | M         | N     | S     | M     | N     | S     | M     | N     | S    |
| Patient 1 | 163.62         | IFN- $\gamma$ | 1.65      | 3.92  | 1.96  | 2.12  | 4.65  | 2.24  | 0.24  | 1.63  | 2.65 |
|           |                | IL-2          | 1.08      | 1.56  | 1.64  | 0.49  | 0.81  | 0.92  | 0.38  | 0.23  | 1.75 |
|           |                | TNF- $\alpha$ | 4.18      | 4.20  | 3.98  | 4.22  | 4.50  | 3.67  | 0.38  | 1.29  | 3.61 |
| Patient 3 | 141.91         | IFN- $\gamma$ | 0.37      | 1.40  | 2.83  | 0.44  | 1.51  | 3.10  | 0.35  | 0.26  | 0.12 |
|           |                | IL-2          | 0.15      | 0.47  | 0.45  | 0.20  | 0.53  | 0.51  | 1.27  | 0.90  | 1.19 |
|           |                | TNF- $\alpha$ | 0.39      | 1.97  | 2.37  | 0.52  | 2.22  | 2.74  | 0.00  | 0.52  | 0.24 |
| Patient 4 | 1746.55        | IFN- $\gamma$ | 8.67      | 8.12  | 26.00 | 8.70  | 4.21  | 29.40 | 0.27  | 20.50 | 0.77 |
|           |                | IL-2          | 1.24      | 1.31  | 6.59  | 0.87  | 0.91  | 6.52  | 0.37  | 0.76  | 0.29 |
|           |                | TNF- $\alpha$ | 3.93      | 3.60  | 10.10 | 3.99  | 2.41  | 11.20 | 0.69  | 7.27  | 0.76 |
| Patient 5 | 530.27         | IFN- $\gamma$ | 3.43      | 3.28  | 6.08  | 3.29  | 3.00  | 5.64  | 0.30  | 2.41  | 1.53 |
|           |                | IL-2          | 0.35      | 0.33  | 0.45  | 0.34  | 0.30  | 0.43  | 0.20  | 0.38  | 0.41 |
|           |                | TNF- $\alpha$ | 1.40      | 1.40  | 2.31  | 1.52  | 1.46  | 2.47  | 0.91  | 1.25  | 0.82 |
| Patient 6 | 15.97          | IFN- $\gamma$ | 0.15      | 0.17  | 0.48  | 0.13  | 0.21  | 0.42  | 0.09  | 0.04  | 0.34 |
|           |                | IL-2          | 0.26      | 0.32  | 0.31  | 0.22  | 0.28  | 0.22  | 0.52  | 0.74  | 0.58 |
|           |                | TNF- $\alpha$ | 0.24      | 0.48  | 0.78  | 0.10  | 0.60  | 0.33  | 0.09  | 0.10  | 0.28 |
| Patient 7 | 27716.61       | IFN- $\gamma$ | 20.80     | 5.36  | 5.51  | 34.20 | 7.19  | 9.23  | 7.35  | 3.84  | 1.58 |
|           |                | IL-2          | 0.98      | 0.59  | 0.65  | 1.64  | 0.85  | 0.95  | 0.26  | 0.26  | 0.27 |
|           |                | TNF- $\alpha$ | 7.06      | 2.83  | 3.33  | 12.60 | 4.19  | 5.89  | 1.27  | 1.47  | 0.33 |
| Patient 8 | 2912.07        | IFN- $\gamma$ | 19.10     | 15.50 | 3.43  | 17.30 | 16.10 | 3.46  | 47.30 | 5.02  | 0.93 |
|           |                | IL-2          | 2.55      | 1.04  | 0.92  | 0.94  | 0.62  | 0.69  | 2.24  | 1.16  | 0.36 |
|           |                | TNF- $\alpha$ | 4.90      | 1.70  | 1.91  | 3.90  | 1.43  | 1.82  | 18.50 | 1.45  | 1.14 |
| Patient 9 | 3088.38        | IFN- $\gamma$ | 17.80     | 0.90  | 8.86  | 18.00 | 0.78  | 9.89  | 5.45  | 6.26  | 1.36 |
|           |                | IL-2          | 2.12      | 0.40  | 0.93  | 2.08  | 0.36  | 0.91  | 0.33  | 0.49  | 0.45 |
|           |                | TNF- $\alpha$ | 5.14      | 0.38  | 3.53  | 5.41  | 0.48  | 3.84  | 0.33  | 0.38  | 0.65 |

Percent IFN- $\gamma$ , IL-2 and TNF- $\alpha$  production from total CD3+, and CD4+ and CD8+ subsets of COVID-19 reactive T cells derived from each recovered donor and stimulated with the peptide libraries derived from M, N and S structural proteins and fold expansion after culture with IL-2/4/7 or IL-2/7/15 cytokine cocktails.



**Table S3. Cytokine production and fold expansion of COVID-19 reactive T cells derived from the different recovered donors and expanded with IL-2/4/21 or IL-2/7/21 cytokine cocktails, related to Figure 1.**

|           |                |               | IL-2/4/21 |      |      |       |      |      |       |      |      |
|-----------|----------------|---------------|-----------|------|------|-------|------|------|-------|------|------|
|           |                |               | CD3 %     |      |      | CD4 % |      |      | CD8 % |      |      |
|           | Fold Expansion |               | M         | N    | S    | M     | N    | S    | M     | N    | S    |
| Patient 3 | 0.57           | IFN- $\gamma$ | 0.03      | 0.14 | 0.09 | 0.00  | 0.09 | 0.16 | 0.00  | 0.00 | 0.00 |
|           |                | IL-2          | 0.12      | 0.09 | 0.09 | 0.13  | 0.09 | 0.16 | 0.00  | 0.00 | 0.00 |
|           |                | TNF- $\alpha$ | 0.10      | 0.14 | 0.14 | 0.06  | 0.00 | 0.12 | 0.00  | 0.00 | 0.00 |
| Patient 4 | 0.53           | IFN- $\gamma$ | 0.30      | 0.52 | 0.36 | 0.52  | 0.79 | 0.13 | 0.00  | 0.00 | 0.00 |
|           |                | IL-2          | 0.30      | 0.26 | 0.82 | 0.52  | 0.20 | 0.63 | 0.00  | 0.00 | 0.00 |
|           |                | TNF- $\alpha$ | 0.40      | 0.17 | 0.21 | 0.26  | 0.00 | 0.13 | 0.00  | 7.69 | 0.00 |
| Patient 5 | 82.96          | IFN- $\gamma$ | 1.11      | 0.20 | 2.53 | 1.81  | 0.29 | 3.63 | 0.00  | 0.00 | 0.00 |
|           |                | IL-2          | 0.12      | 0.13 | 0.13 | 0.13  | 0.09 | 0.15 | 0.00  | 0.00 | 2.17 |
|           |                | TNF- $\alpha$ | 0.66      | 0.09 | 1.66 | 0.87  | 0.13 | 2.36 | 0.00  | 0.00 | 0.00 |
| Patient 6 | 0.08           | IFN- $\gamma$ | 0.30      | 0.19 | 1.15 | 0.16  | 0.00 | 0.61 | 0.00  | 0.00 | 0.00 |
|           |                | IL-2          | 0.40      | 0.84 | 1.02 | 0.31  | 0.30 | 0.81 | 0.00  | 0.00 | 0.00 |
|           |                | TNF- $\alpha$ | 0.90      | 0.47 | 0.00 | 0.47  | 0.45 | 0.00 | 3.70  | 0.00 | 0.00 |
| Patient 7 | 996.18         | IFN- $\gamma$ | 2.46      | 0.64 | 0.55 | 4.99  | 1.08 | 1.00 | 3.37  | 0.22 | 0.63 |
|           |                | IL-2          | 0.10      | 0.10 | 0.15 | 0.11  | 0.10 | 0.06 | 0.24  | 0.00 | 0.00 |
|           |                | TNF- $\alpha$ | 0.93      | 0.34 | 0.28 | 1.95  | 0.50 | 0.42 | 0.72  | 0.22 | 0.00 |
| Patient 8 | 0.71           | IFN- $\gamma$ | 0.07      | 0.27 | 0.08 | 0.23  | 0.54 | 0.00 | 0.00  | 0.00 | 0.00 |
|           |                | IL-2          | 0.26      | 0.25 | 0.29 | 0.00  | 0.33 | 0.14 | 0.00  | 0.48 | 0.56 |
|           |                | TNF- $\alpha$ | 0.19      | 0.13 | 0.12 | 0.23  | 0.33 | 0.14 | 0.00  | 0.00 | 0.00 |
| Patient 9 | 6.77           | IFN- $\gamma$ | 0.45      | 0.15 | 0.12 | 0.51  | 0.24 | 0.11 | 1.49  | 0.00 | 0.97 |
|           |                | IL-2          | 0.16      | 0.21 | 0.16 | 0.16  | 0.24 | 0.16 | 0.00  | 0.00 | 0.00 |
|           |                | TNF- $\alpha$ | 0.24      | 0.15 | 0.14 | 0.34  | 0.20 | 0.24 | 2.99  | 0.00 | 0.00 |
|           |                |               | IL-2/7/21 |      |      |       |      |      |       |      |      |
|           |                |               | CD3 %     |      |      | CD4 % |      |      | CD8 % |      |      |
|           | Fold Expansion |               | M         | N    | S    | M     | N    | S    | M     | N    | S    |
| Patient 3 | 0.85           | IFN- $\gamma$ | 0.97      | 0.35 | 0.23 | 1.27  | 0.44 | 0.18 | 0.00  | 0.00 | 0.00 |
|           |                | IL-2          | 0.73      | 0.66 | 0.31 | 1.27  | 1.10 | 0.37 | 0.00  | 0.00 | 0.52 |
|           |                | TNF- $\alpha$ | 1.70      | 0.31 | 0.17 | 2.55  | 0.88 | 0.18 | 0.00  | 0.72 | 0.00 |
| Patient 4 | 2.72           | IFN- $\gamma$ | 0.21      | 0.38 | 0.29 | 0.07  | 0.16 | 0.09 | 0.00  | 0.33 | 0.72 |
|           |                | IL-2          | 0.09      | 0.05 | 0.09 | 0.17  | 0.00 | 0.09 | 0.40  | 0.33 | 0.00 |
|           |                | TNF- $\alpha$ | 0.13      | 0.19 | 0.16 | 0.17  | 0.22 | 0.18 | 0.40  | 0.00 | 0.00 |
| Patient 5 | 109.68         | IFN- $\gamma$ | 0.87      | 0.06 | 0.47 | 1.62  | 0.09 | 1.11 | 1.52  | 0.00 | 0.54 |
|           |                | IL-2          | 0.07      | 0.07 | 0.07 | 0.20  | 0.12 | 0.14 | 0.00  | 0.00 | 0.00 |
|           |                | TNF- $\alpha$ | 0.18      | 0.07 | 0.20 | 0.44  | 0.20 | 0.59 | 0.76  | 0.57 | 0.54 |
| Patient 6 | 1.82           | IFN- $\gamma$ | 0.21      | 0.17 | 0.13 | 0.18  | 0.00 | 0.00 | 0.28  | 0.21 | 0.34 |
|           |                | IL-2          | 0.16      | 0.05 | 0.11 | 0.45  | 0.51 | 0.00 | 0.10  | 0.07 | 0.34 |
|           |                | TNF- $\alpha$ | 0.19      | 0.22 | 0.14 | 0.45  | 1.01 | 2.58 | 0.94  | 0.35 | 0.93 |
| Patient 7 | 415.98         | IFN- $\gamma$ | 0.74      | 0.30 | 0.50 | 2.93  | 0.81 | 1.36 | 0.39  | 0.39 | 0.41 |
|           |                | IL-2          | 0.10      | 0.07 | 0.15 | 0.43  | 0.22 | 0.14 | 0.39  | 0.13 | 0.00 |
|           |                | TNF- $\alpha$ | 0.44      | 0.18 | 0.25 | 2.22  | 0.81 | 0.61 | 0.39  | 0.26 | 0.10 |
| Patient 8 | 2.03           | IFN- $\gamma$ | 0.14      | 0.21 | 0.11 | 0.23  | 0.09 | 0.11 | 0.00  | 5.82 | 0.00 |
|           |                | IL-2          | 0.06      | 0.05 | 0.11 | 0.10  | 0.12 | 0.20 | 1.75  | 0.53 | 0.83 |
|           |                | TNF- $\alpha$ | 0.13      | 0.25 | 0.26 | 0.25  | 0.33 | 0.44 | 0.00  | 0.53 | 0.42 |
| Patient 9 | 78.48          | IFN- $\gamma$ | 0.76      | 0.25 | 0.49 | 1.87  | 0.30 | 1.01 | 0.00  | 0.60 | 1.11 |
|           |                | IL-2          | 0.03      | 0.11 | 0.09 | 0.13  | 0.56 | 0.57 | 0.00  | 0.60 | 0.37 |
|           |                | TNF- $\alpha$ | 0.19      | 0.14 | 0.25 | 0.52  | 0.19 | 0.64 | 0.00  | 0.60 | 0.00 |

Percent IFN- $\gamma$ , IL-2 and TNF- $\alpha$  production from total CD3+, and in CD4+ and CD8+ subsets of COVID-19 reactive T cells derived from each recovered donor and stimulated with the peptide libraries derived from M, N and S structural proteins and fold expansion after culture with IL-2/4/21 or IL-2/7/21 cytokine cocktails.

**Table S4. Cytokine production of COVID-19 reactive T cells from recovered donors expanded with IL-2/4/7 or IL-2/7/15 against S1 and S2 (N and C terminals of the S protein), related to Figure 2.**

|           |               | IL-2/4/7 |      |       |      |       |       |
|-----------|---------------|----------|------|-------|------|-------|-------|
|           |               | CD3 %    |      | CD4 % |      | CD8 % |       |
|           |               | S1       | S2   | S1    | S2   | S1    | S2    |
| Patient 1 | IFN- $\gamma$ | 4.69     | 0.71 | 4.47  | 0.66 | 0.70  | 0.60  |
|           | IL-2          | 0.58     | 0.38 | 0.59  | 0.45 | 0.09  | 0.15  |
|           | TNF- $\alpha$ | 7.19     | 1.11 | 5.97  | 0.75 | 0.26  | 0.45  |
| Patient 3 | IFN- $\gamma$ | 1.33     | 5.12 | 1.00  | 0.46 | 1.43  | 3.62  |
|           | IL-2          | 0.19     | 0.24 | 0.12  | 0.07 | 1.04  | 0.75  |
|           | TNF- $\alpha$ | 2.62     | 0.92 | 1.86  | 0.51 | 7.04  | 1.09  |
| Patient 4 | IFN- $\gamma$ | 10.20    | 7.84 | 8.33  | 6.60 | 13.20 | 6.29  |
|           | IL-2          | 2.58     | 4.48 | 1.04  | 2.72 | 6.15  | 6.47  |
|           | TNF- $\alpha$ | 2.85     | 1.52 | 2.30  | 0.88 | 3.71  | 1.15  |
| Patient 5 | IFN- $\gamma$ | 26.20    | 1.93 | 9.10  | 2.14 | 12.20 | 3.12  |
|           | IL-2          | 0.14     | 0.83 | 0.09  | 0.37 | 0.00  | 3.29  |
|           | TNF- $\alpha$ | 4.62     | 2.63 | 3.62  | 1.60 | 9.38  | 2.44  |
| Patient 6 | IFN- $\gamma$ | 6.92     | 1.09 | 10.60 | 1.31 | 2.70  | 1.05  |
|           | IL-2          | 1.50     | 1.22 | 1.20  | 1.49 | 2.52  | 2.44  |
|           | TNF- $\alpha$ | 9.47     | 0.72 | 12.80 | 0.86 | 0.00  | 0.00  |
| Patient 7 | IFN- $\gamma$ | 26.50    | 8.54 | 20.80 | 3.66 | 12.90 | 2.11  |
|           | IL-2          | 5.03     | 0.36 | 2.55  | 0.13 | 0.60  | 5.79  |
|           | TNF- $\alpha$ | 2.42     | 1.30 | 1.67  | 0.61 | 8.70  | 2.63  |
| Patient 8 | IFN- $\gamma$ | 1.53     | 3.84 | 1.42  | 1.34 | 1.88  | 3.40  |
|           | IL-2          | 0.17     | 0.41 | 0.06  | 0.15 | 3.56  | 1.99  |
|           | TNF- $\alpha$ | 3.62     | 1.67 | 2.81  | 1.08 | 27.30 | 13.70 |
| Patient 9 | IFN- $\gamma$ | 2.67     | 3.92 | 1.22  | 1.76 | 3.34  | 3.60  |
|           | IL-2          | 0.48     | 0.61 | 0.22  | 0.38 | 6.05  | 4.32  |
|           | TNF- $\alpha$ | 0.45     | 1.63 | 0.33  | 1.00 | 3.97  | 14.70 |

|           |               | IL-2/7/15 |       |       |       |       |       |
|-----------|---------------|-----------|-------|-------|-------|-------|-------|
|           |               | CD3 %     |       | CD4 % |       | CD8 % |       |
|           |               | S1        | S2    | S1    | S2    | S1    | S2    |
| Patient 1 | IFN- $\gamma$ | 5.96      | 3.25  | 4.47  | 3.72  | 0.83  | 7.77  |
|           | IL-2          | 0.8       | 0.58  | 0.59  | 0.69  | 4.13  | 3.88  |
|           | TNF- $\alpha$ | 7.59      | 1.17  | 5.97  | 0.93  | 5.79  | 0.97  |
| Patient 3 | IFN- $\gamma$ | 7.43      | 1.61  | 1.05  | 0.76  | 4.57  | 1.72  |
|           | IL-2          | 0.41      | 0.13  | 0.07  | 0.04  | 3.28  | 0.54  |
|           | TNF- $\alpha$ | 5.06      | 2.48  | 3.70  | 1.45  | 26.20 | 18.40 |
| Patient 4 | IFN- $\gamma$ | 18.00     | 14.60 | 2.50  | 1.32  | 10.10 | 5.90  |
|           | IL-2          | 1.57      | 1.29  | 0.22  | 0.12  | 1.04  | 0.75  |
|           | TNF- $\alpha$ | 1.94      | 1.93  | 1.53  | 1.31  | 8.33  | 8.86  |
| Patient 5 | IFN- $\gamma$ | 4.99      | 1.96  | 0.82  | 1.81  | 5.86  | 0.46  |
|           | IL-2          | 0.12      | 0.05  | 0.05  | 0.03  | 3.15  | 0.46  |
|           | TNF- $\alpha$ | 1.63      | 4.14  | 0.84  | 3.05  | 12.20 | 22.60 |
| Patient 6 | IFN- $\gamma$ | 3.95      | 2.72  | 1.97  | 2.53  | 1.22  | 1.20  |
|           | IL-2          | 0.80      | 0.24  | 0.21  | 0.09  | 1.28  | 0.40  |
|           | TNF- $\alpha$ | 2.46      | 2.29  | 1.51  | 1.41  | 18.70 | 15.30 |
| Patient 7 | IFN- $\gamma$ | 11.10     | 1.72  | 15.80 | 2.00  | 2.70  | 1.05  |
|           | IL-2          | 4.37      | 3.80  | 3.02  | 2.34  | 3.60  | 3.48  |
|           | TNF- $\alpha$ | 10.50     | 0.95  | 13.90 | 1.03  | 0.36  | 0.00  |
| Patient 8 | IFN- $\gamma$ | 1.73      | 4.34  | 2.71  | 10.50 | 1.81  | 3.70  |
|           | IL-2          | 0.12      | 4.97  | 0.18  | 1.13  | 0.14  | 4.48  |
|           | TNF- $\alpha$ | 1.57      | 2.10  | 1.38  | 2.25  | 16.10 | 13.90 |
| Patient 9 | IFN- $\gamma$ | 5.92      | 5.03  | 7.23  | 6.43  | 4.48  | 2.71  |
|           | IL-2          | 1.20      | 1.21  | 0.47  | 0.42  | 2.90  | 2.98  |
|           | TNF- $\alpha$ | 1.59      | 1.41  | 4.48  | 0.38  | 0.40  | 0.27  |

Percent IFN- $\gamma$ , IL-2 and TNF- $\alpha$  production from total CD3<sup>+</sup>, and CD4<sup>+</sup> and CD8<sup>+</sup> subsets of COVID-19 reactive T cells derived from each recovered donor and stimulated with the peptide libraries derived from S1 and S2 (N and C terminals of the S protein) after expansion with IL-2/4/7 or IL-2/7/15 cytokine cocktails.

**Table S5. Cytokine production of COVID-19 reactive T cells from recovered donors expanded with IL-2/4/21 or IL-2/7/21 against S1 and S2 (N and C terminals of the S protein), related to Figure 2.**

|                  |               | IL-2/4/21 |      |       |      |       |      |
|------------------|---------------|-----------|------|-------|------|-------|------|
|                  |               | CD3 %     |      | CD4 % |      | CD8 % |      |
|                  |               | S1        | S2   | S1    | S2   | S1    | S2   |
| <b>Patient 3</b> | IFN- $\gamma$ | 0.04      | 0.08 | 0.02  | 0.05 | 0.00  | 0.00 |
|                  | IL-2          | 0.12      | 0.16 | 0.13  | 0.16 | 0.00  | 0.00 |
|                  | TNF- $\alpha$ | 0.08      | 0.05 | 0.08  | 0.04 | 0.00  | 1.59 |
| <b>Patient 4</b> | IFN- $\gamma$ | 0.17      | 0.19 | 0.14  | 0.23 | 0.00  | 0.00 |
|                  | IL-2          | 0.40      | 0.57 | 0.68  | 0.23 | 0.00  | 0.00 |
|                  | TNF- $\alpha$ | 0.40      | 0.19 | 0.27  | 0.00 | 0.00  | 0.00 |
| <b>Patient 5</b> | IFN- $\gamma$ | 4.15      | 0.14 | 6.21  | 0.22 | 0.00  | 0.00 |
|                  | IL-2          | 0.17      | 0.08 | 0.24  | 0.09 | 0.00  | 0.00 |
|                  | TNF- $\alpha$ | 1.78      | 0.13 | 2.69  | 0.22 | 0.00  | 0.00 |
| <b>Patient 6</b> | IFN- $\gamma$ | 0.33      | 0.14 | 0.17  | 0.22 | 0.00  | 0.00 |
|                  | IL-2          | 0.00      | 0.57 | 0.00  | 0.44 | 0.00  | 0.00 |
|                  | TNF- $\alpha$ | 1.00      | 0.72 | 0.34  | 0.22 | 0.00  | 0.00 |
| <b>Patient 7</b> | IFN- $\gamma$ | 0.68      | 0.21 | 1.12  | 0.60 | 0.67  | 0.00 |
|                  | IL-2          | 0.21      | 0.18 | 0.31  | 0.22 | 0.22  | 0.33 |
|                  | TNF- $\alpha$ | 0.23      | 0.12 | 0.35  | 0.18 | 0.00  | 0.67 |
| <b>Patient 8</b> | IFN- $\gamma$ | 0.08      | 0.09 | 0.00  | 0.14 | 0.00  | 0.00 |
|                  | IL-2          | 0.35      | 0.16 | 0.14  | 0.00 | 0.66  | 0.61 |
|                  | TNF- $\alpha$ | 0.18      | 0.14 | 0.29  | 0.00 | 0.00  | 0.00 |
| <b>Patient 9</b> | IFN- $\gamma$ | 0.03      | 0.26 | 0.08  | 0.50 | 0.00  | 0.00 |
|                  | IL-2          | 0.10      | 0.13 | 0.11  | 0.12 | 0.00  | 0.00 |
|                  | TNF- $\alpha$ | 0.07      | 0.20 | 0.16  | 0.30 | 0.00  | 0.00 |
|                  |               | IL-2/7/21 |      |       |      |       |      |
|                  |               | CD3 %     |      | CD4 % |      | CD8 % |      |
|                  |               | S1        | S2   | S1    | S2   | S1    | S2   |
| <b>Patient 3</b> | IFN- $\gamma$ | 0.05      | 0.10 | 0.00  | 0.00 | 0.58  | 0.00 |
|                  | IL-2          | 0.11      | 0.21 | 0.09  | 0.43 | 0.00  | 0.69 |
|                  | TNF- $\alpha$ | 0.22      | 0.07 | 0.35  | 0.14 | 0.00  | 0.00 |
| <b>Patient 4</b> | IFN- $\gamma$ | 0.20      | 0.13 | 0.23  | 0.10 | 0.00  | 0.00 |
|                  | IL-2          | 0.07      | 0.21 | 0.10  | 0.24 | 0.00  | 0.87 |
|                  | TNF- $\alpha$ | 0.16      | 0.15 | 0.20  | 0.07 | 0.00  | 0.00 |
| <b>Patient 5</b> | IFN- $\gamma$ | 0.89      | 0.05 | 2.22  | 0.08 | 0.00  | 0.00 |
|                  | IL-2          | 0.08      | 0.14 | 0.17  | 0.11 | 0.00  | 0.83 |
|                  | TNF- $\alpha$ | 0.37      | 0.06 | 1.01  | 0.15 | 0.00  | 0.83 |
| <b>Patient 6</b> | IFN- $\gamma$ | 0.20      | 0.13 | 0.34  | 1.00 | 0.43  | 0.10 |
|                  | IL-2          | 0.06      | 0.08 | 0.34  | 1.50 | 0.22  | 0.00 |
|                  | TNF- $\alpha$ | 0.16      | 0.07 | 1.02  | 1.50 | 0.43  | 0.50 |
| <b>Patient 7</b> | IFN- $\gamma$ | 0.31      | 0.12 | 0.86  | 0.21 | 0.63  | 0.47 |
|                  | IL-2          | 0.06      | 0.04 | 0.11  | 0.39 | 0.00  | 0.00 |
|                  | TNF- $\alpha$ | 0.20      | 0.09 | 1.18  | 0.21 | 0.63  | 0.00 |
| <b>Patient 8</b> | IFN- $\gamma$ | 0.10      | 0.09 | 0.13  | 0.05 | 0.56  | 0.00 |
|                  | IL-2          | 0.08      | 0.07 | 0.18  | 0.18 | 0.00  | 0.00 |
|                  | TNF- $\alpha$ | 0.20      | 0.23 | 0.31  | 0.55 | 0.00  | 0.00 |
| <b>Patient 9</b> | IFN- $\gamma$ | 0.05      | 0.63 | 0.04  | 1.24 | 0.27  | 0.35 |
|                  | IL-2          | 0.08      | 0.07 | 0.37  | 0.41 | 0.54  | 0.35 |
|                  | TNF- $\alpha$ | 0.08      | 0.31 | 0.20  | 0.85 | 0.54  | 0.35 |

Percent IFN- $\gamma$ , IL-2 and TNF- $\alpha$  production from total CD3+, and CD4+ and CD8+ subsets of COVID-19 reactive T cells derived from each recovered donor and stimulated with the peptide libraries derived from S1 and S2 (N and C terminals of the S protein) after expansion with IL-2/4/21 or IL-2/7/21 cytokine cocktails.

**Table S6. Cytokine production of COVID-19 reactive T cells from healthy controls expanded with different cytokine cocktails against M, N and S structural proteins, related to Figure 4.**

|           |                      | CD3 % |      |      | CD4 % |      |      | CD8 % |      |      |
|-----------|----------------------|-------|------|------|-------|------|------|-------|------|------|
|           |                      | M     | N    | S    | M     | N    | S    | M     | N    | S    |
| IL-2/4/7  | IFN- $\gamma$ median | 0.43  | 0.29 | 0.44 | 0.55  | 0.28 | 0.34 | 0.11  | 0.18 | 0.24 |
|           | IFN- $\gamma$ min    | 0.13  | 0.16 | 0.19 | 0.14  | 0.16 | 0.06 | 0.02  | 0.07 | 0.04 |
|           | IFN- $\gamma$ max    | 1.37  | 0.67 | 2.57 | 2.59  | 1.12 | 2.50 | 0.19  | 0.67 | 2.59 |
|           | IL-2 median          | 0.14  | 0.50 | 0.16 | 0.10  | 0.16 | 0.10 | 0.24  | 0.18 | 0.24 |
|           | IL-2 min             | 0.03  | 0.12 | 0.04 | 0.03  | 0.14 | 0.04 | 0.00  | 0.09 | 0.02 |
|           | IL-2 max             | 0.31  | 0.74 | 0.63 | 0.23  | 1.27 | 0.17 | 0.41  | 0.63 | 0.29 |
|           | TNF- $\alpha$ median | 0.25  | 0.23 | 0.16 | 0.26  | 0.57 | 0.27 | 0.04  | 0.22 | 0.19 |
|           | TNF- $\alpha$ min    | 0.15  | 0.17 | 0.06 | 0.11  | 0.07 | 0.07 | 0.02  | 0.12 | 0.02 |
|           | TNF- $\alpha$ max    | 1.11  | 2.34 | 1.59 | 2.19  | 5.17 | 3.55 | 0.18  | 0.28 | 0.67 |
| IL-2/7/15 | IFN- $\gamma$ median | 0.24  | 0.15 | 0.59 | 0.27  | 0.18 | 0.37 | 0.10  | 0.13 | 0.11 |
|           | IFN- $\gamma$ min    | 0.10  | 0.09 | 0.21 | 0.17  | 0.05 | 0.16 | 0.07  | 0.08 | 0.06 |
|           | IFN- $\gamma$ max    | 2.13  | 0.39 | 1.64 | 6.63  | 0.49 | 1.58 | 0.91  | 0.24 | 1.22 |
|           | IL-2 median          | 0.17  | 0.12 | 0.18 | 0.10  | 0.12 | 0.11 | 0.11  | 0.08 | 0.15 |
|           | IL-2 min             | 0.05  | 0.00 | 0.07 | 0.09  | 0.00 | 0.07 | 0.02  | 0.00 | 0.07 |
|           | IL-2 max             | 0.25  | 0.25 | 0.29 | 0.25  | 0.14 | 0.31 | 0.22  | 0.21 | 0.27 |
|           | TNF- $\alpha$ median | 0.12  | 0.12 | 0.18 | 0.24  | 0.21 | 0.31 | 0.10  | 0.10 | 0.14 |
|           | TNF- $\alpha$ min    | 0.09  | 0.02 | 0.09 | 0.10  | 0.00 | 0.14 | 0.06  | 0.01 | 0.08 |
|           | TNF- $\alpha$ max    | 1.44  | 0.14 | 0.38 | 4.88  | 0.23 | 1.14 | 0.24  | 0.18 | 0.22 |

Percent IFN- $\gamma$ , IL-2 and TNF- $\alpha$  production (median, minimum and maximum values) from total CD3+, and CD4+ and CD8+ subsets of COVID-19 reactive T cells stimulated with the peptide libraries derived from M, N and S structural proteins after expansion with the two different cytokine cocktails IL-2/4/7 or IL-2/7/15.

**Table S7. Cytokine production and fold expansion of COVID-19 reactive T cells derived from the different healthy controls and expanded with IL-2/4/7 or IL-2/7/15 cytokine cocktails, related to Figure 4.**

|      |                |               | IL-2/4/7 |      |      |       |      |      |       |      |      |
|------|----------------|---------------|----------|------|------|-------|------|------|-------|------|------|
|      |                |               | CD3 %    |      |      | CD4 % |      |      | CD8 % |      |      |
|      | Fold Expansion |               | M        | N    | S    | M     | N    | S    | M     | N    | S    |
| HD 1 | 21.31          | IFN- $\gamma$ | 0.14     | 0.29 | 2.57 | 0.17  | 0.32 | 2.16 | 0.02  | 0.07 | 0.04 |
|      |                | IL-2          | 0.31     | 0.74 | 0.63 | 0.11  | 0.14 | 0.07 | 0.26  | 0.63 | 0.29 |
|      |                | TNF- $\alpha$ | 0.15     | 0.23 | 0.06 | 0.14  | 0.27 | 0.58 | 0.02  | 0.22 | 0.11 |
| HD 2 | 8.13           | IFN- $\gamma$ | 0.13     | 0.25 | 0.44 | 0.14  | 0.28 | 0.24 | 0.19  | 0.30 | 0.22 |
|      |                | IL-2          | 0.25     | 0.50 | 0.27 | 0.10  | 0.16 | 0.10 | 0.41  | 0.30 | 0.27 |
|      |                | TNF- $\alpha$ | 0.16     | 0.21 | 0.16 | 0.26  | 0.57 | 0.27 | 0.18  | 0.27 | 0.19 |
| HD 3 | 2.85           | IFN- $\gamma$ | 0.43     | 0.16 | 0.19 | 0.55  | 0.16 | 0.06 | 0.11  | 0.18 | 0.24 |
|      |                | IL-2          | 0.14     | 0.12 | 0.13 | 0.23  | 0.15 | 0.10 | 0.24  | 0.18 | 0.06 |
|      |                | TNF- $\alpha$ | 0.25     | 0.17 | 0.12 | 0.11  | 0.07 | 0.07 | 0.17  | 0.12 | 0.38 |
| HD4  | 27.74          | IFN- $\gamma$ | 1.37     | 0.67 | 0.33 | 1.57  | 1.12 | 0.34 | 0.08  | 0.17 | 0.41 |
|      |                | IL-2          | 0.04     | 0.65 | 0.04 | 0.04  | 1.27 | 0.04 | 0.00  | 0.15 | 0.02 |
|      |                | TNF- $\alpha$ | 1.11     | 2.34 | 0.22 | 1.38  | 5.17 | 0.27 | 0.03  | 0.28 | 0.02 |
| HD5  | 41.84          | IFN- $\gamma$ | 0.84     | 0.60 | 1.83 | 2.59  | 0.27 | 2.50 | 0.12  | 0.67 | 2.59 |
|      |                | IL-2          | 0.03     | 0.15 | 0.16 | 0.03  | 0.22 | 0.17 | 0.03  | 0.09 | 0.24 |
|      |                | TNF- $\alpha$ | 0.63     | 0.62 | 1.59 | 2.19  | 0.96 | 3.55 | 0.04  | 0.22 | 0.67 |

  

|      |                |               | IL-2/7/15 |      |      |       |      |      |       |      |      |
|------|----------------|---------------|-----------|------|------|-------|------|------|-------|------|------|
|      |                |               | CD3 %     |      |      | CD4 % |      |      | CD8 % |      |      |
|      | Fold Expansion |               | M         | N    | S    | M     | N    | S    | M     | N    | S    |
| HD 1 | 15.73          | IFN- $\gamma$ | 0.24      | 0.23 | 0.56 | 0.26  | 0.30 | 0.36 | 0.10  | 0.10 | 0.11 |
|      |                | IL-2          | 0.25      | 0.25 | 0.29 | 0.09  | 0.12 | 0.09 | 0.22  | 0.18 | 0.18 |
|      |                | TNF- $\alpha$ | 0.09      | 0.12 | 0.09 | 0.13  | 0.21 | 0.23 | 0.07  | 0.10 | 0.08 |
| HD 2 | 9.01           | IFN- $\gamma$ | 0.10      | 0.11 | 0.21 | 0.17  | 0.13 | 0.16 | 0.07  | 0.17 | 0.06 |
|      |                | IL-2          | 0.17      | 0.13 | 0.18 | 0.10  | 0.12 | 0.11 | 0.15  | 0.21 | 0.27 |
|      |                | TNF- $\alpha$ | 0.12      | 0.14 | 0.15 | 0.24  | 0.22 | 0.34 | 0.10  | 0.13 | 0.11 |
| HD 3 | 4.00           | IFN- $\gamma$ | 0.24      | 0.15 | 0.59 | 0.27  | 0.18 | 0.37 | 0.10  | 0.08 | 0.09 |
|      |                | IL-2          | 0.13      | 0.12 | 0.14 | 0.13  | 0.14 | 0.18 | 0.10  | 0.08 | 0.13 |
|      |                | TNF- $\alpha$ | 0.12      | 0.13 | 0.18 | 0.10  | 0.11 | 0.14 | 0.22  | 0.18 | 0.15 |
| HD4  | 53.95          | IFN- $\gamma$ | 2.13      | 0.09 | 0.67 | 6.63  | 0.05 | 0.40 | 0.21  | 0.24 | 0.96 |
|      |                | IL-2          | 0.05      | 0.00 | 0.07 | 0.10  | 0.00 | 0.07 | 0.02  | 0.00 | 0.07 |
|      |                | TNF- $\alpha$ | 1.44      | 0.02 | 0.33 | 4.88  | 0.00 | 0.31 | 0.06  | 0.07 | 0.22 |
| HD5  | 24.77          | IFN- $\gamma$ | 1.23      | 0.39 | 1.64 | 1.24  | 0.49 | 1.58 | 0.91  | 0.13 | 1.22 |
|      |                | IL-2          | 0.17      | 0.00 | 0.18 | 0.25  | 0.01 | 0.31 | 0.11  | 0.01 | 0.15 |
|      |                | TNF- $\alpha$ | 0.47      | 0.07 | 0.38 | 1.06  | 0.23 | 1.14 | 0.24  | 0.01 | 0.14 |

Percent IFN- $\gamma$ , IL-2 and TNF- $\alpha$  production from total CD3+, and CD4+ and CD8+ subsets of COVID-19 reactive T cells derived from each healthy donor and stimulated with the peptide libraries derived from M, N and S structural proteins and fold expansion after culture with IL-2/4/7 or IL-2/7/15 cytokine cocktails.
